# Supplementary material for: Predictive value of chest tomography at early stage in moderate to severe ARDS
Source: Research Square preprint supplement (doi:10.21203/rs.3.rs-6907405/v1), 2025-08-11

**Supplementary material**

**Predictive value of chest tomography at early stage in moderate to severe ARDS.**

Alexia Le Corre, MD1, Adel Maamar, MD1, Mathieu Lederlin, MD2,3, Nicolas Terzi, MD1,4, Jean-Marc Tadié, MD1,4, Arnaud Gacouin, MD1,4

**Supplementary Appendix 1: CT-score details**

|  | All (n=114) | CT-score ≥18 (n=58) | CT-score <18 (n=56) | P-value |
| --- | --- | --- | --- | --- |
| CT-score median | 18 [14-22] | 22 [20-23] | 14 [11-15] | <0.001 |

Data are presented as median (interquartile range) or n (%), unless otherwise stated. Abbreviations: CT, computed tomography.

**Supplementary Appendix 2: Aetiology of patients classified as “others” ARDS aetiology**

| Main ARDS aetiology | Number of patients |
| --- | --- |
| Acute pancreatitis | 2 |
| Fulminant hepatitis | 1 |
| Acute decompensation of cirrhosis | 1 |
| Transfused related acute lung injury | 2 |
| New diagnosis of Antisynthetase syndrome | 2 |
| Drowning | 2 |
| Exertional heat stroke | 1 |
| Hypersensitivity pneumonia | 1 |
| Pulmonary leucostatis | 1 |
| Addicted drug | 1 |
| Unknown | 1 |

**Supplementary Appendix 3: Subgroup of intubated patients during CT acquisition and ventilatory parameters according to CT-score (n=99)**

|  | CT-score  ≥18 (n=50) | CT-score  <18 (n=49) | P-value | Correlation with CT-score | P-value |
| --- | --- | --- | --- | --- | --- |
| VT (ml/kg PBW) | 6.2 [6.0-6.6] | 6.3 [6.0-6.9] | 0.123 |  |  |
| Maximal RR (breaths/min) | 28 [25-30] | 28 [26-30] | 0.571 |  |  |
| PEEP (cmH2O) | 12 [8-14] | 10 [8-14] | 0.436 |  |  |
| PPlat (cmH2O) | 26 [24-28] | 25 [20-27] | 0.025 | R = 0.33 | <0.001 |
| DP (cmH2O) | 14 [12-18] | 13 [10-16] | 0.046 | R = 0.32 | 0.001 |
| Crs (ml/cmH2O)) | 27.8 [22.2-35.5] | 32.7 [25.3- 38.7 | 0.034 | R = -0.33 | <0.001 |
| V’Ecorr (L/min) | 15.3 [12.6- 20.1] | 15.4 [12.2- 19.8] | 0.831 |  |  |
| [(4xDP) + RR] | 82 [77- 101] | 76 [70-94] | 0.063 |  |  |
| MP (J/min/Kg PBW) | 0.32 [0.28-0.36] | 0.32 [0.25-0.36] | 0.490 |  |  |
| VR | 2.72 [2.09-3.27] | 2.68 [2.07-3.05] | 0.644 |  |  |
| (A-a) gradient | 392.5 [275.9-518.7] | 411.4 [343.6-532.3] | 0.350 |  |  |
| pH | 7.25 [7.15-7.31] | 7.23 [7.09-7.29] | 0.429 |  |  |
| PaCO2 (mmHg) | 56.5 [49.3-66.8] | 55.0 [49.0-64.0] | 0.721 |  |  |
| PaO2 (mmHg) | 70.0 [63.0-81.0] | 72.0 [64.0-79.0] | 0.975 |  |  |
| FiO2 (%) | 73 [60-100] | 80 [70-100] | 0.408 |  |  |

Data are presented as median (interquartile range) or n (%), unless otherwise stated. Abbreviations: CT, computed tomography; VT, tidal volume; PBW,predicted body weight; RR, respiratory rate; PEEP, positive end-expiratory pressure; PPlat, plateau pressure; DP, driving pressure; Crs, static respiratory system compliance; V’Ecorr, corrected minute ventilation volume; MP, mechanical power; VR, ventilatory ratio; A-a gradient, alveolar-arterial oxygen gradient; PaCO2, partial arterial pressure of carbon dioxide; PaO2, partial arterial pressure of oxygen; FiO2, inspired oxygen concentration.

**Supplementary Appendix 4: Time inclusion distribution of the study.**
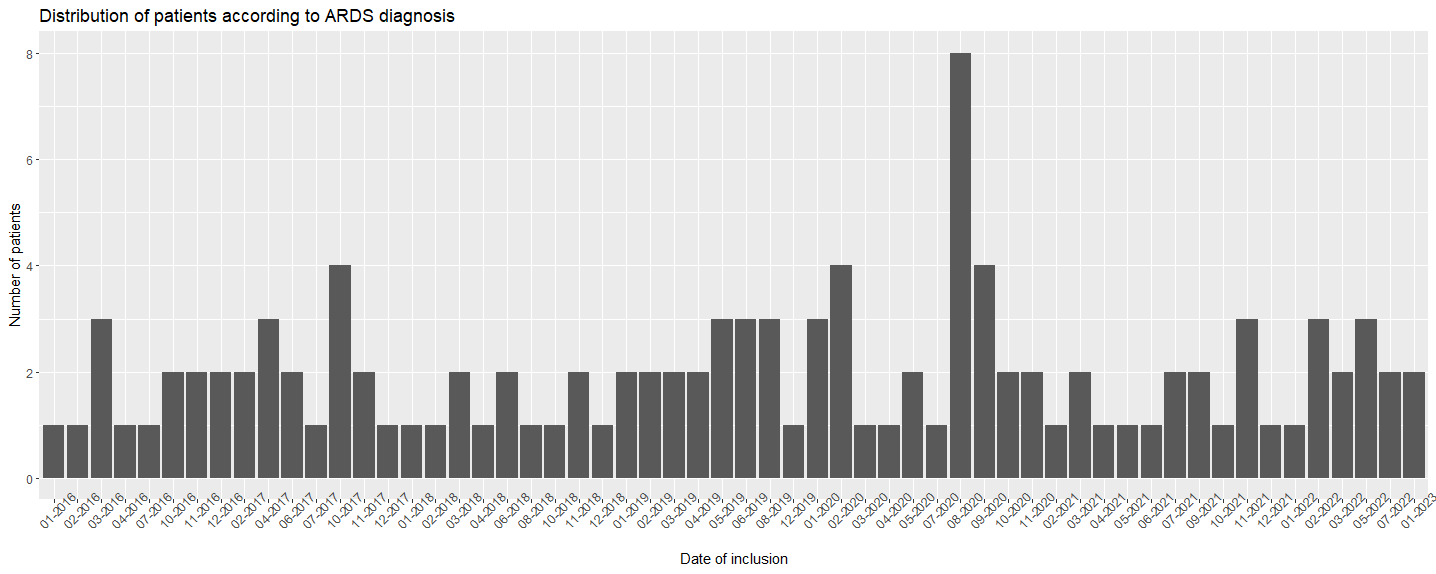

Supplement: Supplementary file 1 [file 34e76ea5c400f8040f86dcd8.docx]
